# Supplementary material
Source: Research Square preprint supplement (doi:10.21203/rs.3.rs-9847186/v1)
Supplement: Supplementary file 1 [file deea4cfbb7206a290d2368a5.pdf]

# **Maternal–pup mercury relationship in South American sea lions and fur seals**

Anaclara Roselli-Laclau <sup>a,b</sup>, Javier García-Alonso <sup>b,c</sup>, Alex Valdés <sup>a,b</sup>, Mariana Freitas-Souza <sup>d</sup>, Marcelo G. Almeida <sup>d</sup>, Carlos Eduardo de Rezende <sup>d</sup> & Valentina Franco-Trecu <sup>a,c</sup> \*

<sup>a</sup> Departamento de Ecología y Evolución, Facultad de Ciencias, Universidad de la República, Iguá 4225, 11400, Montevideo Uruguay. \*Corresponding author: [vfranco-trecu@fcien.edu.uy](mailto:vfranco-trecu@fcien.edu.uy)

<sup>b</sup> Departamento de Ecología y Gestión Ambiental, Centro Universitario Región Este, Universidad de la República, Cachimba del Rey y Aparicio Saravia, 20000, Maldonado, Uruguay.

<sup>c</sup> Instituto de Ciencias Oceánicas, Universidad de la República, Montevideo, Uruguay.

<sup>d</sup> Laboratório de Ciências Ambientais, Centro de Biociências e Biotecnologia, Universidade Estadual do Norte Fluminense Darcy Ribeiro, Avenida Alberto Lamego, 2000, Parque Califórnia, Campos dos Goytacazes, Rio de Janeiro, 28.013-602, Brazil.

## **Acknowledgements**

We extend our gratitude to all individuals who provided assistance and logistical support during fieldwork in Uruguay and laboratory work in Centro de Biociências e Biotecnologia, Universidade Estadual do Norte Fluminense Darcy Ribeiro, Brazil. Valentina Franto-Trecu and Javier García-Alonso were funded by ANII (SNI) and CSIC (Universidad de la República); Valentina Franco-Trecu was awarded the L'Oréal-UNESCO For Women in Science Award (Uruguay, 2024). Anaclara Roselli-Laclau and Alex Valdes were funded by CSIC-PAIE (N°62) and Anaclara Roselli-Laclau was funded by ANII (scholarship code POS\_NAC\_2024\_1\_183584). The present article is a contribution to Anaclara Roselli-Laclau's graduate thesis, supervised by Valentina Franco-Trecu and Javier García-Alonso.

### Highlights:

- Maternal mercury transfer occurs in both pinnipeds; pups levels support monitoring.
- South American sea lion pups have exceptionally high mercury levels.
- High mercury level in pups suggests a risk of immunological and developmental issues.
- Using pup hair provides a non-invasive, efficient method for contaminant monitoring.
